# Supplementary material for: A low-complexity metabolic network model for the respiratory and fermentative metabolism of Escherichia coli
Source: PubMed Central journal article supplement (PMC6114798; doi:10.1371/journal.pone.0202565), 2018-08-29
Supplement: pone.0202565.s001.pdf [file pone.0202565.s001.pdf]

## S1 Text

In this appendix, all mathematical equations developed in this paper are summarized in a schematic and accessible way. Under both aerobic and anaerobic conditions the following differential equations hold for the substances present in the medium:

$$\begin{aligned}
 \text{Biomass growth:} \quad \frac{dC_X}{dt} &= \mu \cdot C_X = (q_G - m_G) \cdot Y_{X/G} \cdot C_X \\
 &= (q_{G,max} \cdot \frac{C_G}{K_G + C_G} - m_G) \cdot Y_{X/G} \cdot C_X \\
 \text{Glucose consumption:} \quad \frac{dC_G}{dt} &= -q_G \cdot C_X \\
 \text{Acetic acid excretion:} \quad \frac{dC_A}{dt} &= q_A \cdot C_X \\
 \text{Formic acid excretion:} \quad \frac{dC_F}{dt} &= q_F \cdot C_X \\
 \text{Lactic acid excretion:} \quad \frac{dC_L}{dt} &= q_L \cdot C_X
 \end{aligned}$$

Under fully aerobic conditions (Sector 1 in Fig. ??), the maintenance coefficient  $m_G$  consists of three terms:

$$m_G^{(1)} = m_{G,ref}^{(1)} + A^{(1)} \cdot \frac{[H^+] - 10^{-7}}{[H^+]_{min} - 10^{-7}} + B^{(1)} \cdot \sum_i \frac{[U_i]}{[U_i]_{min}^a},$$

with  $[H^+]$  and  $[U_i]$  respectively the concentration of protons and undissociated acids in the medium. The constants  $A^{(1)}$  and  $B^{(1)}$  are calculated as follows:

$$\begin{aligned}
 A^{(1)} &= q_{G,max}^a - m_{G,ref}^{(1)}, \\
 B_A^{(1)} &= q_{G,max}^a + \Delta q_{G/A} \cdot [U_A]_{min}^a - m_{G,ref}^{(1)} \\
 &\quad - A^{(1)} \cdot \frac{10^{-4.2} + 10^{-5.4} - 2 \cdot 10^{-7}}{2 \cdot ([H^+]_{min} - 10^{-7})}.
 \end{aligned}$$

Under fully aerobic conditions, *Escherichia coli* cells do not excrete any weak acid into their surroundings, meaning that

$$q_A = q_F = q_L = 0 \frac{\text{mol}}{\text{gDW} \cdot \text{h}}.$$

Under anaerobic conditions, the maintenance and biomass yield coefficient are determined by a linear combination of LDH and PFL metabolic pathways (see Fig. ??):

$$\begin{aligned}
 Y_{X/G} &= \beta \cdot Y_{X/G}^{LDH} + (1 - \beta) \cdot Y_{X/G}^{PFL}, \\
 m_G &= \beta \cdot m_G^{LDH} + (1 - \beta) \cdot m_G^{PFL}.
 \end{aligned}$$

Maintenance coefficients for the LDH and PFL metabolism are calculated in similar way to the maintenance coefficient under fully aerobic conditions. The variable  $\beta$  represents the fraction of pyruvate converted to lactic acid, and is a function of the extracellular pH:

$$\beta(\text{pH}) = \frac{1}{1 + \exp(1.9547 \cdot (\text{pH} - 5.7809))}.$$

The specific excretion rates of acetic, formic, and lactic acid under anaerobic conditions is expressed as follows:

$$\begin{aligned}
 q_A &= (1 - \beta) \cdot \left( Y_{A/G,max} \cdot q_G + \frac{m_G^{PFL}}{m_{G,ref}^{PFL}} \cdot q_{A,ref}^{PFL} |_{q_G=0} \right), \\
 q_F &= (1 - \beta) \cdot \left( (1 - \alpha) \cdot \left( Y_{F/G,max} \cdot q_G + \frac{m_G^{PFL}}{m_{G,ref}^{PFL}} \cdot q_{F,ref}^{PFL} |_{q_G=0} \right) \right), \\
 q_L &= \beta \cdot \left( Y_{L/G,max} \cdot q_G + \frac{m_G^{LDH}}{m_{G,ref}^{LDH}} \cdot q_{L,ref}^{LDH} |_{q_G=0} \right),
 \end{aligned}$$

with  $\alpha$  indicating the fraction of formic acid that is intracellularly converted to dihydrogen and carbon dioxide as a function of extracellular pH:

$$\alpha(\text{pH}) = \frac{1}{1 + \exp(11.3021 \cdot (\text{pH} - 6.3133))}.$$

Values for all parameters in the previous mathematical expressions are listed in Table ??.
